# Supplementary material
Source: publisher figshare collection journal article supplement (https://acs.figshare.com/ndownloader/files/4710199)

# Supporting Information

## Nigriganosides A and B, Antimitotic Glycolipids Isolated from the Green Alga *Avrainvillea Nigrans* Collected in Dominica

David. E. Williams<sup>†</sup>, Christopher M. Sturgeon<sup>¶</sup>, Michel Roberge<sup>¶\*</sup>, and Raymond J. Andersen<sup>†\*</sup>

*Departments of Chemistry and Earth & Ocean Sciences, University of British Columbia, Vancouver, B. C., CANADA, V6T 1Z1;*  
*Department of Biochemistry and Molecular Biology, University of British Columbia, Vancouver, B. C., CANADA, V6T 1Z3*

### Table of contents

|                        |                                                                                                                                                                                                                                                                |
|------------------------|----------------------------------------------------------------------------------------------------------------------------------------------------------------------------------------------------------------------------------------------------------------|
| Pages SI-2<br>to SI-3: | Experimental section<br>General Experimental Procedures<br>Algal material<br>Extraction of <i>Avrainvillea nigrans</i> and Isolation of Nigriganoside A and B<br>Dimethyl Esters ( <b>3</b> and <b>4</b> )<br>Preparation of Hydronigriganoside Dimethyl Ester |
| Pages SI-4<br>to SI-5: | Table 1. <sup>1</sup> H and <sup>13</sup> C NMR Data for Nigriganoside A & B Dimethyl Esters ( <b>3</b> & <b>4</b> )<br>recorded in 540 µL of 25:2 C <sub>6</sub> D <sub>6</sub> /DMSO- <i>d</i> <sub>6</sub> .                                                |
| Page SI-6:             | <sup>1</sup> H NMR Spectrum of Nigriganoside A Dimethyl Ester ( <b>3</b> ) recorded at 600 MHz in<br>25:2 C <sub>6</sub> D <sub>6</sub> /DMSO- <i>d</i> <sub>6</sub> .                                                                                         |
| Page SI-7:             | <sup>13</sup> C NMR Spectrum of Nigriganoside A Dimethyl Ester ( <b>3</b> ) recorded at 150 MHz in<br>25:2 C <sub>6</sub> D <sub>6</sub> /DMSO- <i>d</i> <sub>6</sub> .                                                                                        |
| Page SI-8:             | gradCOSY60 NMR Spectrum of Nigriganoside A Dimethyl Ester ( <b>3</b> ) recorded at 600<br>MHz in 25:2 C <sub>6</sub> D <sub>6</sub> /DMSO- <i>d</i> <sub>6</sub> .                                                                                             |
| Page SI-9:             | gradHSQC NMR Spectrum of Nigriganoside A Dimethyl Ester ( <b>3</b> ) recorded at 600<br>MHz in 25:2 C <sub>6</sub> D <sub>6</sub> /DMSO- <i>d</i> <sub>6</sub> .                                                                                               |
| Page SI-10:            | gradHMBC NMR Spectrum of Nigriganoside A Dimethyl Ester ( <b>3</b> ) recorded at 600<br>MHz in 25:2 C <sub>6</sub> D <sub>6</sub> /DMSO- <i>d</i> <sub>6</sub> .                                                                                               |
| Page SI-11:            | ROESY NMR Spectrum of Nigriganoside A Dimethyl Ester ( <b>3</b> ) recorded at 600<br>MHz in 25:2 C <sub>6</sub> D <sub>6</sub> /DMSO- <i>d</i> <sub>6</sub> .                                                                                                  |
| Page SI-12:            | <sup>1</sup> H NMR Spectrum of Nigriganoside B Dimethyl Ester ( <b>4</b> ) recorded at 600 MHz in<br>25:2 C <sub>6</sub> D <sub>6</sub> /DMSO- <i>d</i> <sub>6</sub> .                                                                                         |
| Page SI-13:            | <sup>13</sup> C NMR Spectrum of Nigriganoside B Dimethyl Ester ( <b>4</b> ) recorded at 150 MHz in<br>25:2 C <sub>6</sub> D <sub>6</sub> /DMSO- <i>d</i> <sub>6</sub> .                                                                                        |
| Page SI-14:            | gradCOSY60 NMR Spectrum of Nigriganoside B Dimethyl Ester ( <b>4</b> ) recorded at 600<br>MHz in 25:2 C <sub>6</sub> D <sub>6</sub> /DMSO- <i>d</i> <sub>6</sub> .                                                                                             |
| Page SI-15:            | gradHSQC NMR Spectrum of Nigriganoside B Dimethyl Ester ( <b>4</b> ) recorded at 600<br>MHz in 25:2 C <sub>6</sub> D <sub>6</sub> /DMSO- <i>d</i> <sub>6</sub> .                                                                                               |
| Page SI-16:            | gradHMBC NMR Spectrum of Nigriganoside B Dimethyl Ester ( <b>4</b> ) recorded at 600<br>MHz in 25:2 C <sub>6</sub> D <sub>6</sub> /DMSO- <i>d</i> <sub>6</sub> .                                                                                               |
| Page SI-17:            | ROESY NMR Spectrum of Nigriganoside B Dimethyl Ester ( <b>4</b> ) recorded at 600<br>MHz in 25:2 C <sub>6</sub> D <sub>6</sub> /DMSO- <i>d</i> <sub>6</sub> .                                                                                                  |

## Experimental Section

**General Experimental Procedures.** Optical rotations were measured using a Jasco P-1010 Polarimeter with sodium light (589 nm). The  $^1\text{H}$  and  $^{13}\text{C}$  NMR spectra were recorded on a Bruker AV-600 spectrometer with a 5 mm CPTCI cryoprobe.  $^1\text{H}$  chemical shifts are referenced to the residual  $\text{C}_6\text{D}_6$  signal ( $\delta$  7.15 ppm) and  $^{13}\text{C}$  chemical shifts are referenced to the  $\text{C}_6\text{D}_6$  solvent peak ( $\delta$  128.0 ppm). Low and high resolution ESI-QIT-MS were recorded on a Bruker-Hewlett Packard 1100 Esquire-LC system mass spectrometer. Merck Type 5554 silica gel plates and Whatman MKC18F plates were used for analytical thin layer chromatography. Reversed-phase HPLC purifications were performed on a Waters 600E System Controller liquid chromatography attached to a Waters 996 Photodiode Array Detector. All solvents used for HPLC were Fisher HPLC grade.

**Algal Material.** Specimens of the green algae *Avrainvillea nigricans* DuCaisne were collected by hand using SCUBA in Prince Rupert Bay, Portsmouth, Commonwealth of Dominica at a depth of 25 m. The algal specimens were immediately frozen and transported frozen to Vancouver, Canada. A voucher specimen (ref. no. 04-307) is deposited at the Department of Earth and Ocean Sciences, University of British Columbia, Vancouver, Canada.

**Extraction of *Avrainvillea nigricans* and Isolation of Nigricanoside A and B Dimethyl Esters (3 and 4).** The thawed *Avrainvillea nigricans* (wet weight: 27.8 kg, dried extracted weight: 3.859 kg) was cut into small pieces, immersed in and subsequently extracted repeatedly with MeOH (3 x 30 L) at room temperature. The combined MeOH extracts were concentrated *in vacuo* and the resultant green oil was then partitioned between EtOAc (4 x 2000 mL) and  $\text{H}_2\text{O}$  (5.0 L). The combined EtOAc extract was evaporated to dryness and then extracted between hexanes (4 x 800 mL) and 4:1 MeOH/ $\text{H}_2\text{O}$  (2500 mL). The ratio of the methanolic extract was adjusted to 2:1 MeOH/ $\text{H}_2\text{O}$  (for a total of 3000 mL) and extracted with  $\text{CH}_2\text{Cl}_2$  (4 x 1000 mL). The  $\text{CH}_2\text{Cl}_2$  extracts were combined and evaporated to dryness to give 17.1 g of a potently active antimitotic amorphous green solid. To facilitate the ease of isolation the  $\text{CH}_2\text{Cl}_2$  extract was methylated at this stage. Hence, the active material was treated with diazomethane that was generated *in-situ* by the addition of 30 mL of 2.0 M trimethylsilyldiazomethane in hexanes to 30 mL of anhydrous MeOH in 80 mL of  $\text{C}_6\text{H}_6$ . The reaction mixture was left stirring for 16 hours at room temperature. After evaporation of the reagents the sample was fractionated with Si gel flash chromatography employing a step gradient from 95:5 hexanes/EtOAc to MeOH. The fraction (750.7 mg) eluting with 1:3 MeOH/EtOAc elicited biological activity and was further fractionated on Sephadex LH-20 using 4:1 MeOH/ $\text{CH}_2\text{Cl}_2$  as eluent. An early eluting potently active antimitotic fraction (206.0 mg) was obtained that was fractionated using reversed-phase Si gel flash chromatography employing a step gradient from 1:1 MeOH/ $\text{H}_2\text{O}$  to MeOH with a final  $\text{CH}_2\text{Cl}_2$  wash. A 49.1 mg fraction, eluting with 3:2-4:1 MeOH/ $\text{H}_2\text{O}$ , elicited activity. Pure nigricanoside A dimethyl ester (**3**) (0.8 mg) and nigricanoside B dimethyl ester (**4**) (0.4 mg) were obtained from this mixture via  $\text{C}_{18}$  reversed-phase HPLC using a CSC-Inertsil 150A/ODS2, 5  $\mu\text{m}$  25 x 0.94 cm column, with 9:11 MeCN/ $\text{H}_2\text{O}$  as eluent.

**Nigricanoside A Dimethyl Ester (3):** Isolated as a clear oil;  $[\alpha]_D^{25}$  -42 (c 0.24,  $\text{CH}_2\text{Cl}_2$ );  $^1\text{H}$  NMR, see Table 1;  $^{13}\text{C}$  NMR, see Table 1; positive ion HRESIMS  $[\text{M}+\text{Na}]^+$   $m/z$  923.5323 (calcd for  $\text{C}_{47}\text{H}_{80}\text{O}_{16}\text{Na}$ , 923.5344).

**Nigricanoside B Dimethyl Ester (4):** Isolated as a clear oil;  $[\alpha]_D^{25}$  -34 (c 0.20,  $\text{CH}_2\text{Cl}_2$ );  $^1\text{H}$  NMR, see Table 1;  $^{13}\text{C}$  NMR, see Table 1; positive ion HRESIMS  $[\text{M}+\text{Na}]^+$   $m/z$  921.5186 (calcd for  $\text{C}_{47}\text{H}_{78}\text{O}_{16}\text{Na}$ , 921.5188).

**Preparation of Perhydronigriganoside Dimethyl Ester:** Nigriganoside B dimethyl ester (**4**) (0.4 mg) was dissolved in EtOH (0.5 mL) and reduced with H<sub>2</sub> gas on palladium/charcoal 10% catalyst with stirring overnight at rt. The reaction mixture was filtered and concentrated *in vacuo*.

**Hydronigriganoside Dimethyl Ester:** Isolated as a clear oil; positive ion HRESIMS [M+Na]<sup>+</sup> *m/z* 933.6126 (calcd for C<sub>47</sub>H<sub>90</sub>O<sub>16</sub>Na, 933.6127).

**Table 1.**  $^1\text{H}$  and  $^{13}\text{C}$  NMR Data for Nigriganoside A & B Dimethyl Esters (**3** & **4**) recorded in 540  $\mu\text{L}$  of 25:2  $\text{C}_6\text{D}_6/\text{DMSO}-d_6$

| Atom # | <b>1<sup>a</sup></b>                                           |                              | <b>2<sup>a</sup></b>                                           |                              |
|--------|----------------------------------------------------------------|------------------------------|----------------------------------------------------------------|------------------------------|
|        | $^1\text{H}$ ( $\delta$ )                                      | $^{13}\text{C}$ ( $\delta$ ) | $^1\text{H}$ ( $\delta$ )                                      | $^{13}\text{C}$ ( $\delta$ ) |
| 1      |                                                                | 173.5                        |                                                                | 173.4                        |
| 2      | 2.17<br>2.17                                                   | 34.16                        | 2.17 t $J=7.4$ Hz<br>2.17 t $J=7.4$ Hz                         | 34.16                        |
| 3      | 1.62<br>1.62                                                   | 25.36                        | 1.62<br>1.62                                                   | 25.37                        |
| 4      | 1.45 m<br>1.53 m                                               | 25.56                        | 1.44 m<br>1.54                                                 | 25.56                        |
| 5      | 1.56 m<br>1.65                                                 | 37.84                        | 1.57<br>1.65                                                   | 37.81                        |
| 6      | 4.25                                                           | 71.46                        | 4.26                                                           | 71.49                        |
| 7      | 6.00 dd $J=15.5, 5.5$ Hz                                       | 136.29                       | 6.01 dd $J=15.7, 5.2$ Hz                                       | 136.29                       |
| 8      | 6.11 dd $J=15.5, 6.4$ Hz                                       | 129.34                       | 6.12 dd $J=15.7, 6.6$ Hz                                       | 129.34                       |
| 9      | 4.50 m                                                         | 73.17                        | 4.51                                                           | 73.15                        |
| 10     | 3.78 m                                                         | 81.74                        | 3.80                                                           | 81.70                        |
| 11     | 2.45 m<br>2.58 m                                               | 29.45                        | 2.46 m<br>2.59 m                                               | 29.44                        |
| 12     | 5.68 m                                                         | 127.52                       | 5.69 m                                                         | 127.55                       |
| 13     | 5.55 m                                                         | 131.32 <sup>1</sup>          | 5.56                                                           | 131.55                       |
| 14     | 2.12 ddd $J=7.4, 7.4, 7.4$ Hz<br>2.12 ddd $J=7.4, 7.4, 7.4$ Hz | 29.87                        | 2.12 ddd $J=7.4, 7.4, 7.4$ Hz<br>2.12 ddd $J=7.4, 7.4, 7.4$ Hz | 29.88                        |
| 15     | 1.40 qdd $J=7.4, 7.4, 7.4$ Hz<br>1.40 qdd $J=7.4, 7.4, 7.4$ Hz | 23.16                        | 1.40 qdd $J=7.4, 7.4, 7.4$ Hz<br>1.40 qdd $J=7.4, 7.4, 7.4$ Hz | 23.18                        |
| 16     | 0.92 t $J=7.4$ Hz                                              | 14.11                        | 0.93 t $J=7.4$ Hz                                              | 14.12                        |
| 1-OMe  | 3.41 s                                                         | 51.10                        | 3.41 s                                                         | 51.10                        |
| 6-OH   | 4.55 d $J=4.5$ Hz                                              |                              | 4.49 d $J=4.1$ Hz                                              |                              |
| 9-OH   | 5.06 d $J=4.6$ Hz                                              |                              | 5.04 t $J=4.8$ Hz                                              |                              |
| 1'     |                                                                | 173.6                        |                                                                | 173.5                        |
| 2'     | 2.16<br>2.16                                                   | 33.38                        | 2.16 t $J=6.5$ Hz<br>2.16 t $J=6.5$ Hz                         | 33.38                        |
| 3'     | 1.62<br>1.62                                                   | 25.05                        | 1.62<br>1.62                                                   | 25.05                        |
| 4'     | 2.01 ddd $J=7.4, 7.4, 7.4$ Hz                                  | 26.98                        | 2.00 ddd $J=7.4, 7.4, 7.4$ Hz                                  | 26.99                        |
| 5'     | 5.41 m                                                         | 130.52                       | 5.41                                                           | 130.58                       |
| 6'     | 5.59 m                                                         | 126.99                       | 5.59 m                                                         | 126.97                       |
| 7'     | 2.32 m<br>2.48                                                 | 34.16                        | 2.32 m<br>2.47                                                 | 34.16                        |
| 8'     | 3.80                                                           | 80.84                        | 3.81                                                           | 80.83                        |
| 9'     | 5.74 dd $J=15.7, 7.6$ Hz                                       | 134.70                       | 5.74 dd $J=15.7, 7.6$ Hz                                       | 134.78                       |
| 10'    | 5.88 dd $J=15.7, 7.5$ Hz                                       | 131.34 <sup>1</sup>          | 5.88 dd $J=15.7, 7.4$ Hz                                       | 131.35                       |

|         |                                                      |                    |                                                      |        |
|---------|------------------------------------------------------|--------------------|------------------------------------------------------|--------|
| 11'     | 4.26                                                 | 83.08              | 4.27                                                 | 83.02  |
| 12'     | 3.96                                                 | 73.84              | 3.97                                                 | 73.76  |
| 13'     | 2.53<br>2.53                                         | 30.66              | 2.53 m<br>2.58 m                                     | 30.63  |
| 14'     | 5.81 m                                               | 127.55             | 5.82 m                                               | 128.04 |
| 15'     | 5.55 m                                               | 131.27             | 5.55                                                 | 129.52 |
| 16'     | 2.15<br>2.15                                         | 27.85              | 2.95 t $J=7.0$ Hz<br>2.95 t $J=7.0$ Hz               | 26.22  |
| 17'     | 1.29<br>1.38                                         | 29.77              | 5.46 m                                               | 127.90 |
| 18'     | 1.29<br>1.29                                         | 31.84              | 5.43                                                 | 132.00 |
| 19'     | 1.29<br>1.29                                         | 22.95              | 2.07 qd $J=7.3, 7.3$ Hz<br>2.07 qd $J=7.3, 7.3$ Hz   | 20.93  |
| 20'     | 0.88 bt $J=7.0$ Hz                                   | 14.31              | 0.94 t $J=7.3$ Hz                                    | 14.29  |
| 1'-OMe  | 3.37 s                                               | 51.0               | 3.37 s                                               | 51.00  |
| 12'-OH  | 4.79 d $J=5.7$ Hz                                    |                    | 4.80 d $J=5.8$ Hz                                    |        |
| 1''     | 4.41 d $J=7.7$ Hz                                    | 105.11             | 4.41 d $J=7.7$ Hz                                    | 105.10 |
| 2''     | 3.95                                                 | 71.98              | 3.97                                                 | 72.04  |
| 3''     | 3.69 m                                               | 74.50 <sup>2</sup> | 3.69 m                                               | 74.51  |
| 4''     | 4.03 m                                               | 69.22              | 4.04 m                                               | 69.25  |
| 5''     | 3.65 bt $J=6.1$ Hz                                   | 74.51 <sup>2</sup> | 3.65 bt $J=6.0$ Hz                                   | 74.51  |
| 6''     | 3.72 dd $J=9.6, 6.1$ Hz<br>4.01 dd $J=9.6, 6.1$ Hz   | 68.06              | 3.73 dd $J=9.3, 6.0$ Hz<br>4.02 dd $J=9.3, 6.0$ Hz   | 68.03  |
| 2''-OH  | 5.26 bs                                              |                    | 5.24 bs                                              |        |
| 3''-OH  | 4.68 bs                                              |                    | 4.63 bs                                              |        |
| 4''-OH  | 4.30 d $J=3.8$ Hz                                    |                    | 4.27                                                 |        |
| 1'''    | 3.94 dd $J=10.4, 4.0$ Hz<br>4.14 dd $J=10.4, 5.6$ Hz | 72.40              | 3.94 dd $J=10.6, 3.8$ Hz<br>4.15 dd $J=10.6, 5.6$ Hz | 72.41  |
| 2'''    | 4.09 m                                               | 71.58              | 4.09 m                                               | 71.58  |
| 3'''    | 3.88 m<br>3.88 m                                     | 64.07              | 3.88 m<br>3.88 m                                     | 64.09  |
| 2'''-OH | 4.79 d $J=5.7$ Hz                                    |                    | 4.77 d $J=5.5$ Hz                                    |        |
| 3'''-OH | 4.39 m                                               |                    | 4.33 t $J=5.9$ Hz                                    |        |

<sup>1,2</sup>Assignments within a column are interchangeable

$^1\text{H}$  NMR Spectrum of Nigriganoside A Dimethyl Ester (**3**) recorded at 600 MHz in 25:2  $\text{C}_6\text{D}_6/\text{DMSO}-d_6$

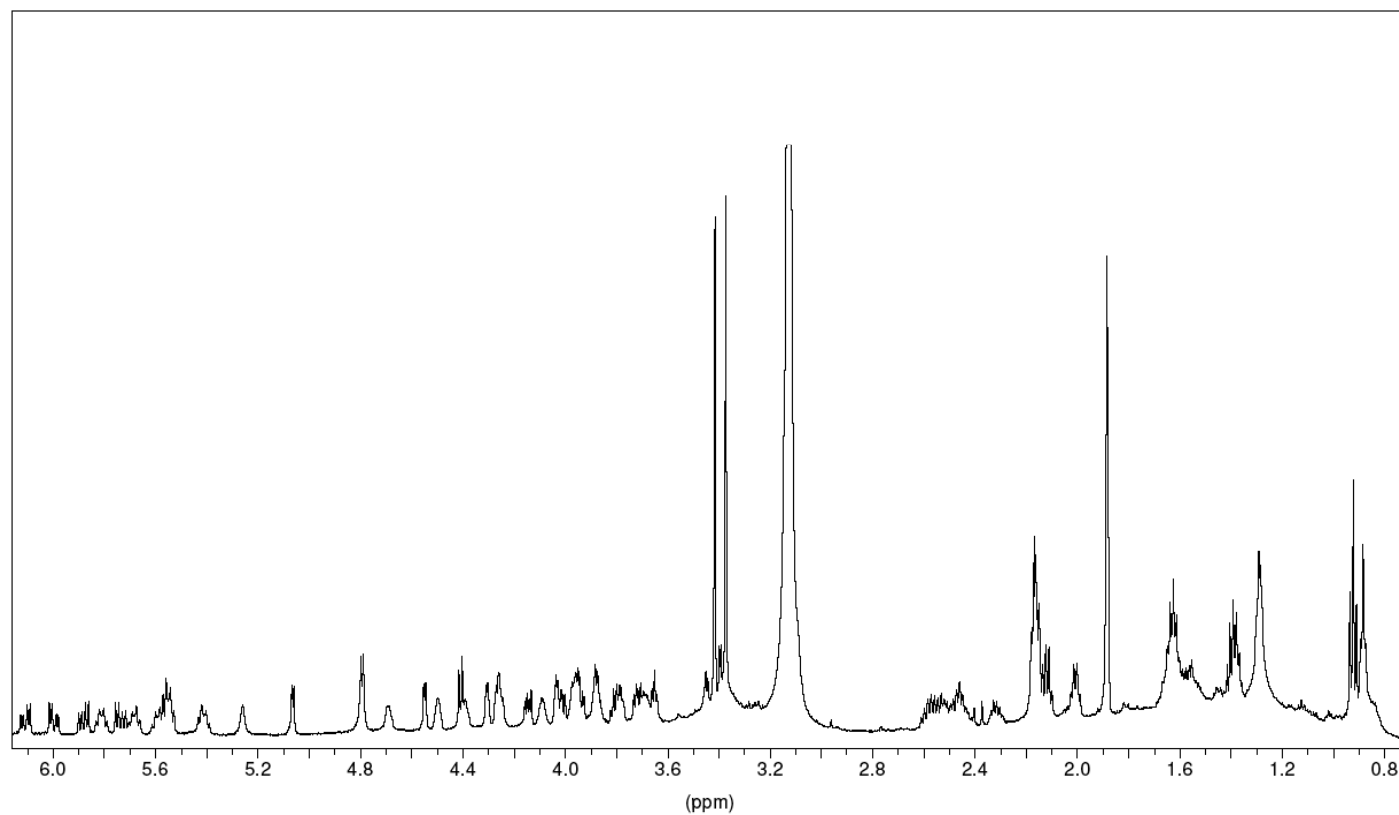

$^{13}\text{C}$  NMR Spectrum of Nigriganoside A Dimethyl Ester (**3**) recorded at 150 MHz in 25:2  $\text{C}_6\text{D}_6/\text{DMSO}-d_6$

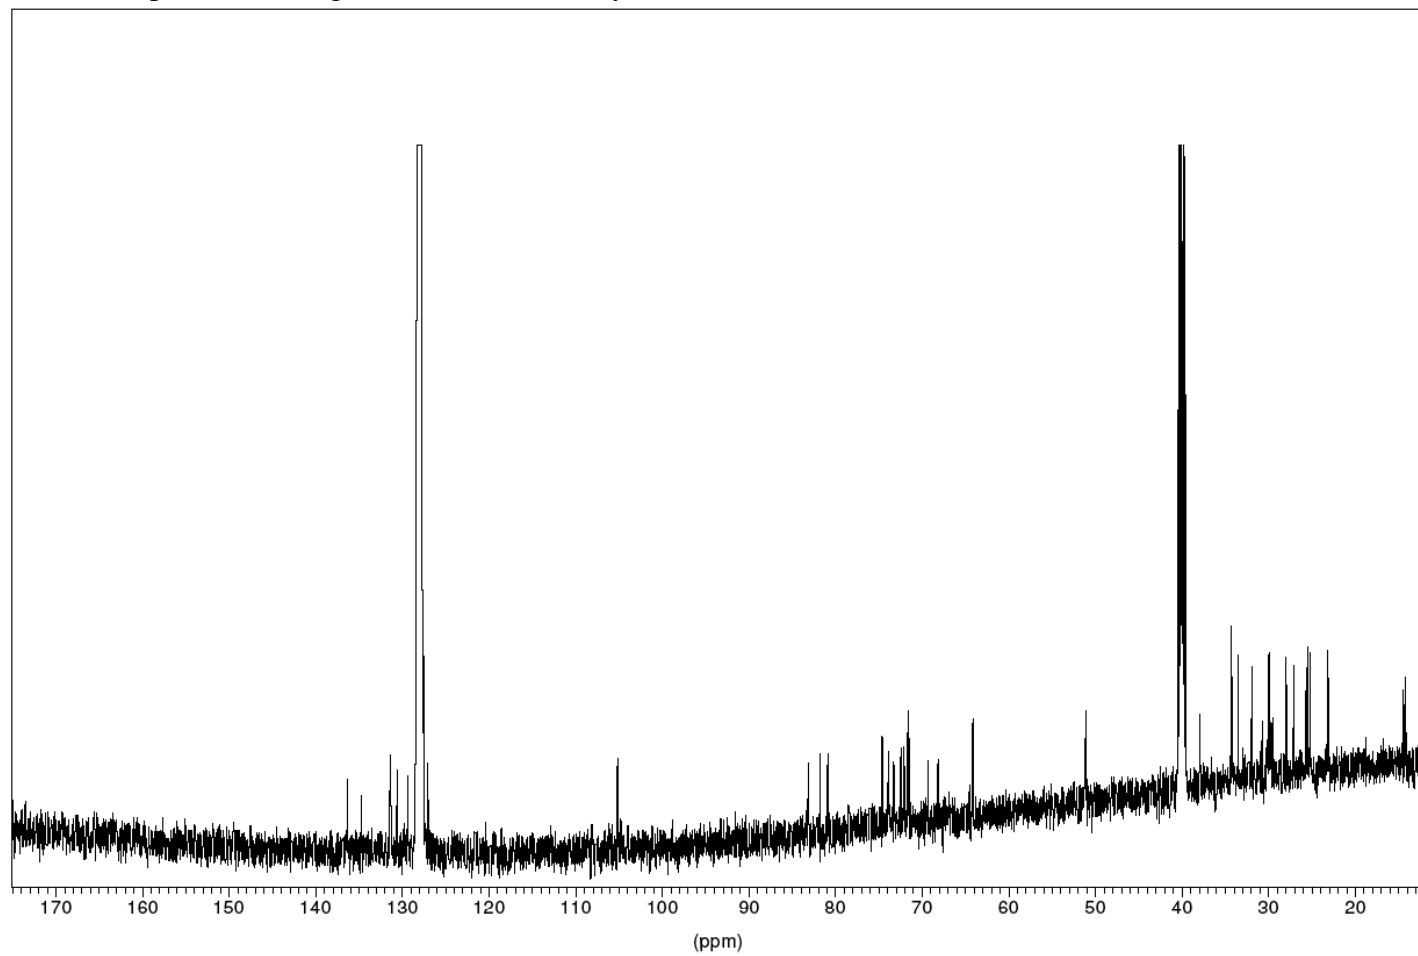

gradCOSY60 NMR Spectrum of Nigriganoside A Dimethyl Ester (**3**) recorded at 600 MHz in 25:2  
 $\text{C}_6\text{D}_6/\text{DMSO}-d_6$

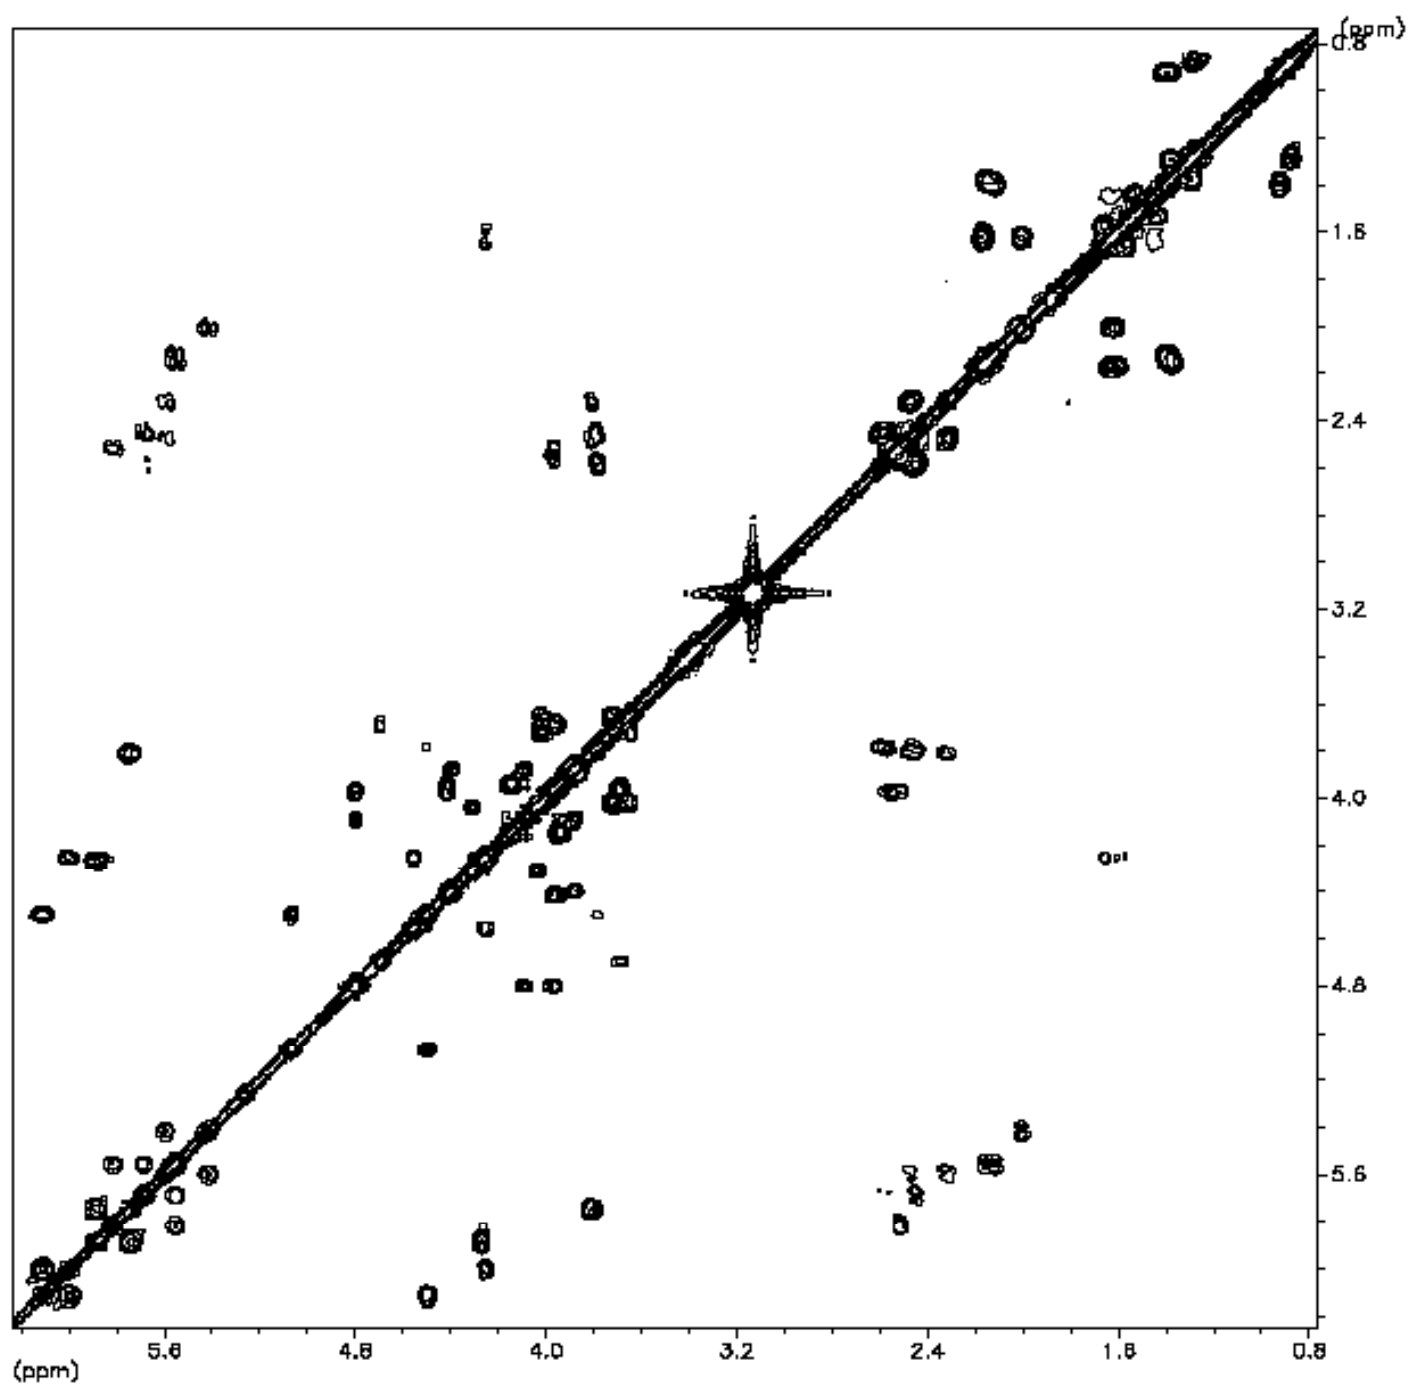



gradHSQC NMR Spectrum of Nigriganoside A Dimethyl Ester (**3**) recorded at 600 MHz in 25:2  
 $C_6D_6/DMSO-d_6$

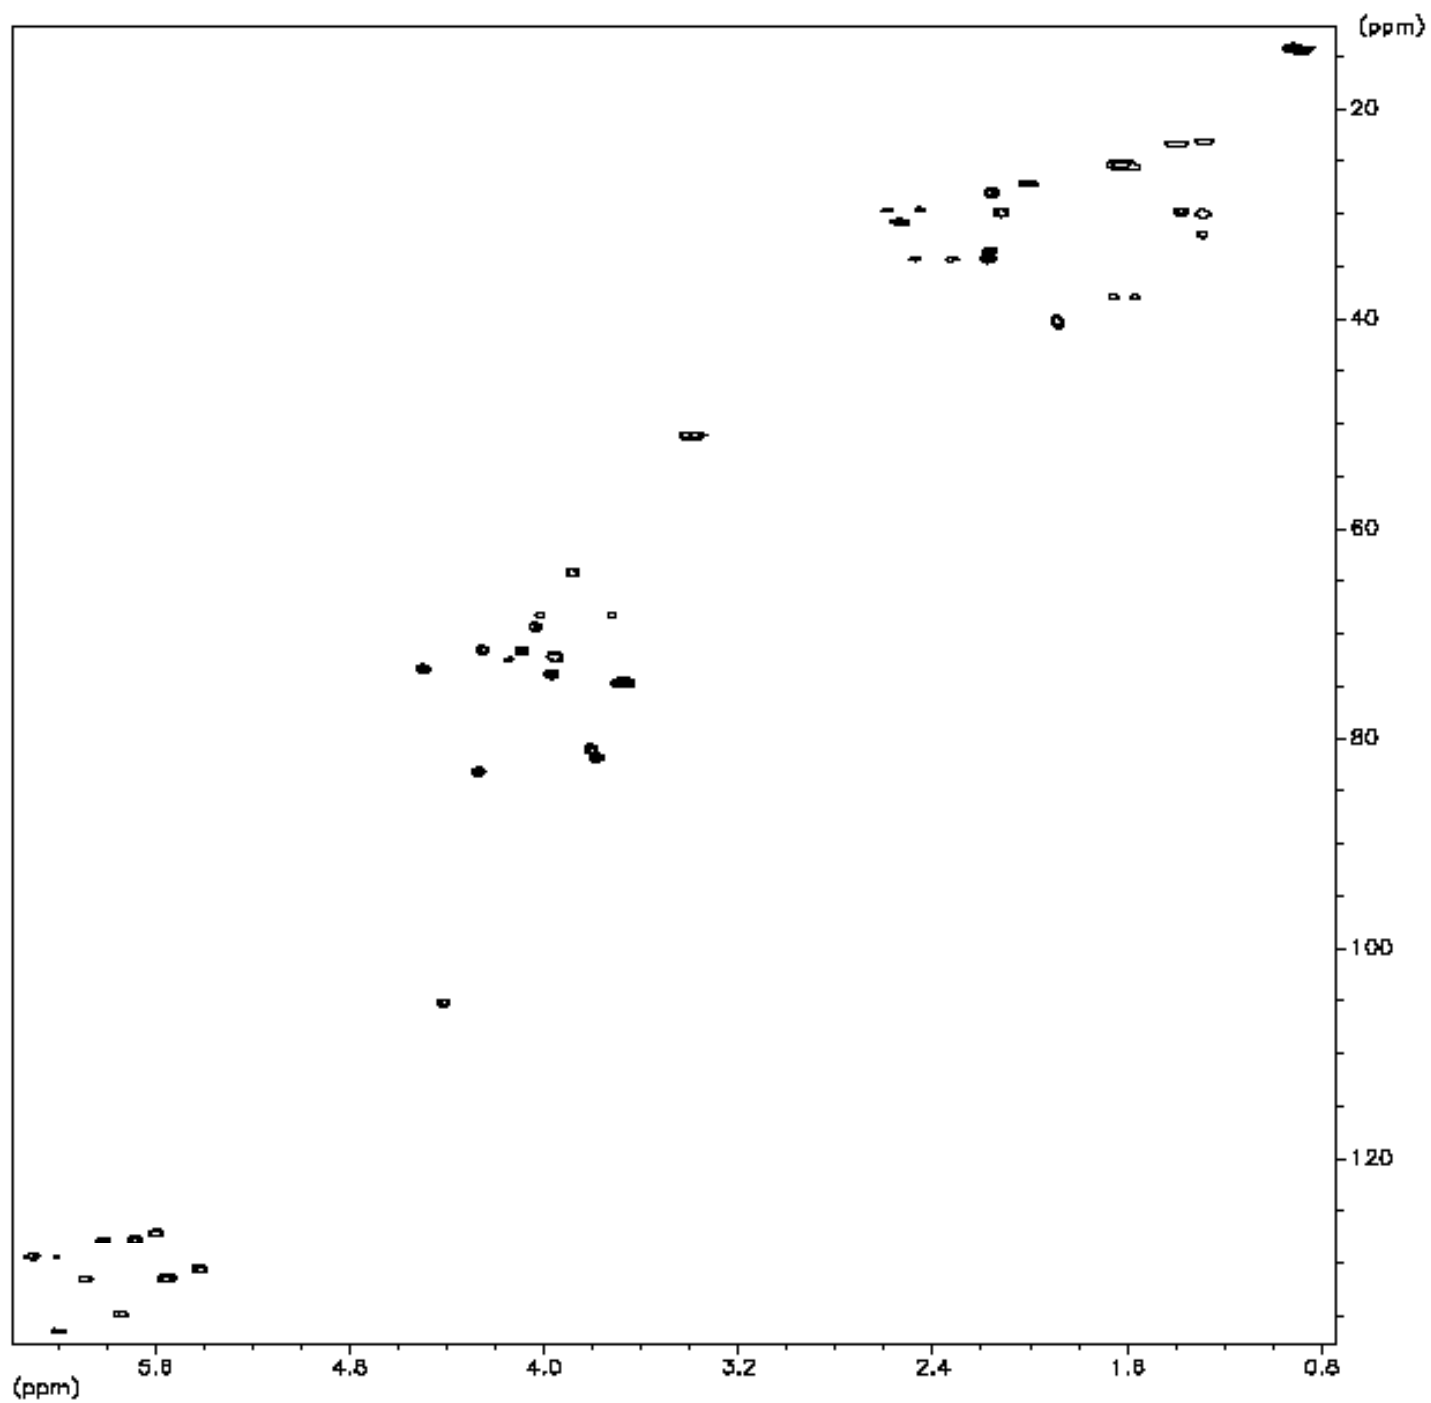

gradHMBC NMR Spectrum of Nigricanoside A Dimethyl Ester (**3**) recorded at 600 MHz in 25:2  
 $C_6D_6/DMSO-d_6$

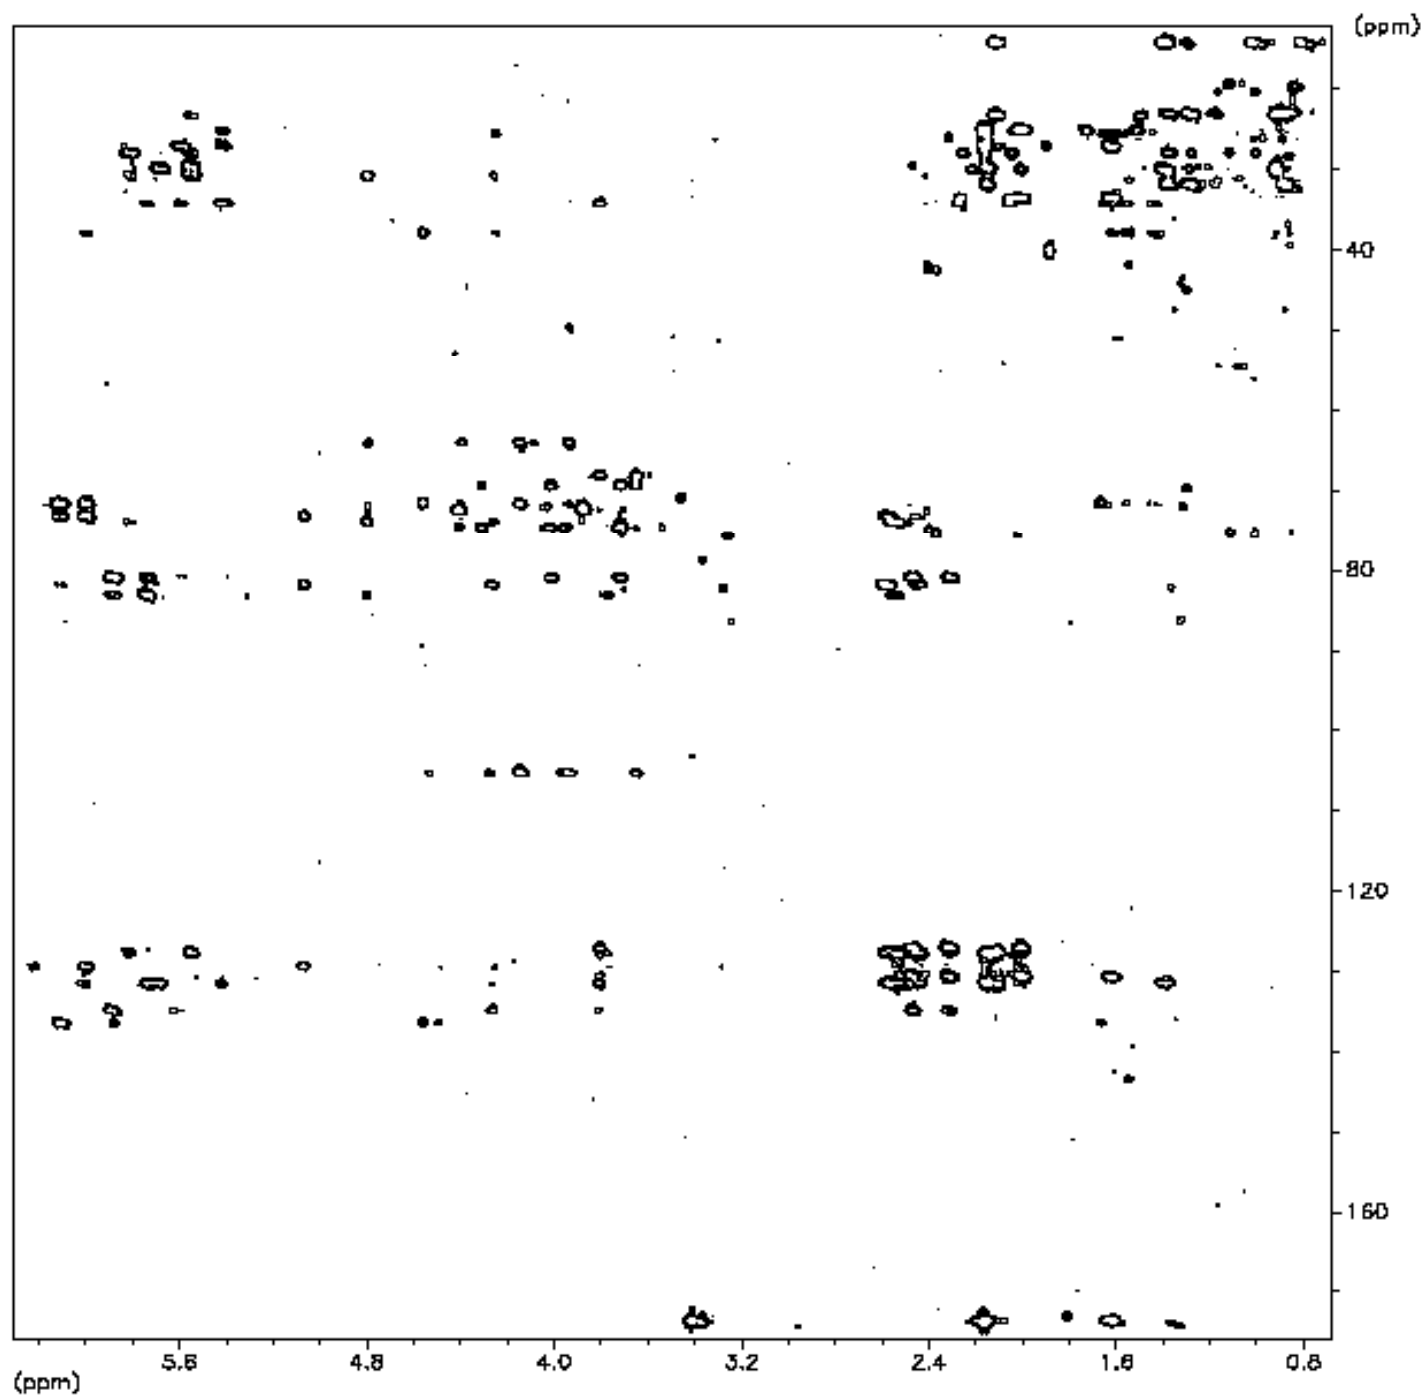

ROESY NMR Spectrum of Nigriganoside A Dimethyl Ester (**3**) recorded at 600 MHz in 25:2  
 $C_6D_6/DMSO-d_6$

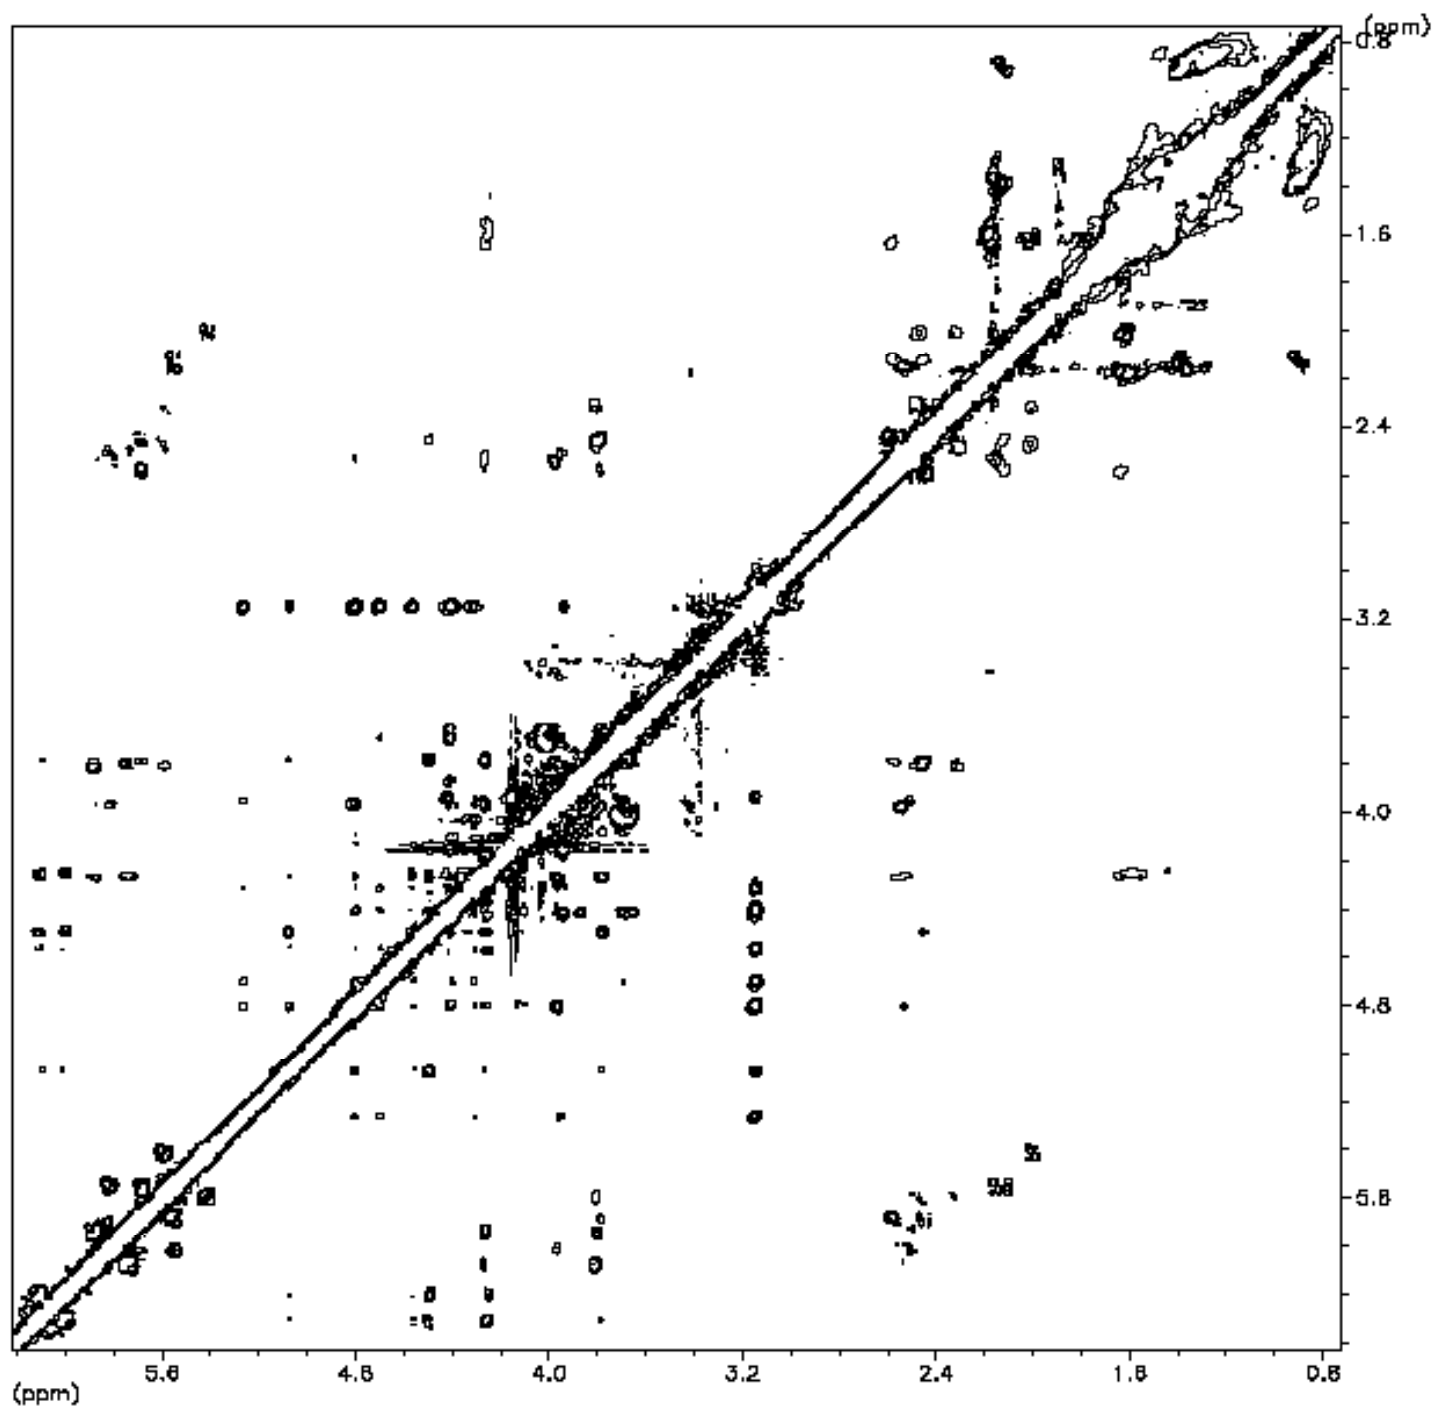

$^1\text{H}$  NMR Spectrum of Nigriganoside B Dimethyl Ester (**4**) recorded at 600 MHz in 25:2  $\text{C}_6\text{D}_6/\text{DMSO}-d_6$

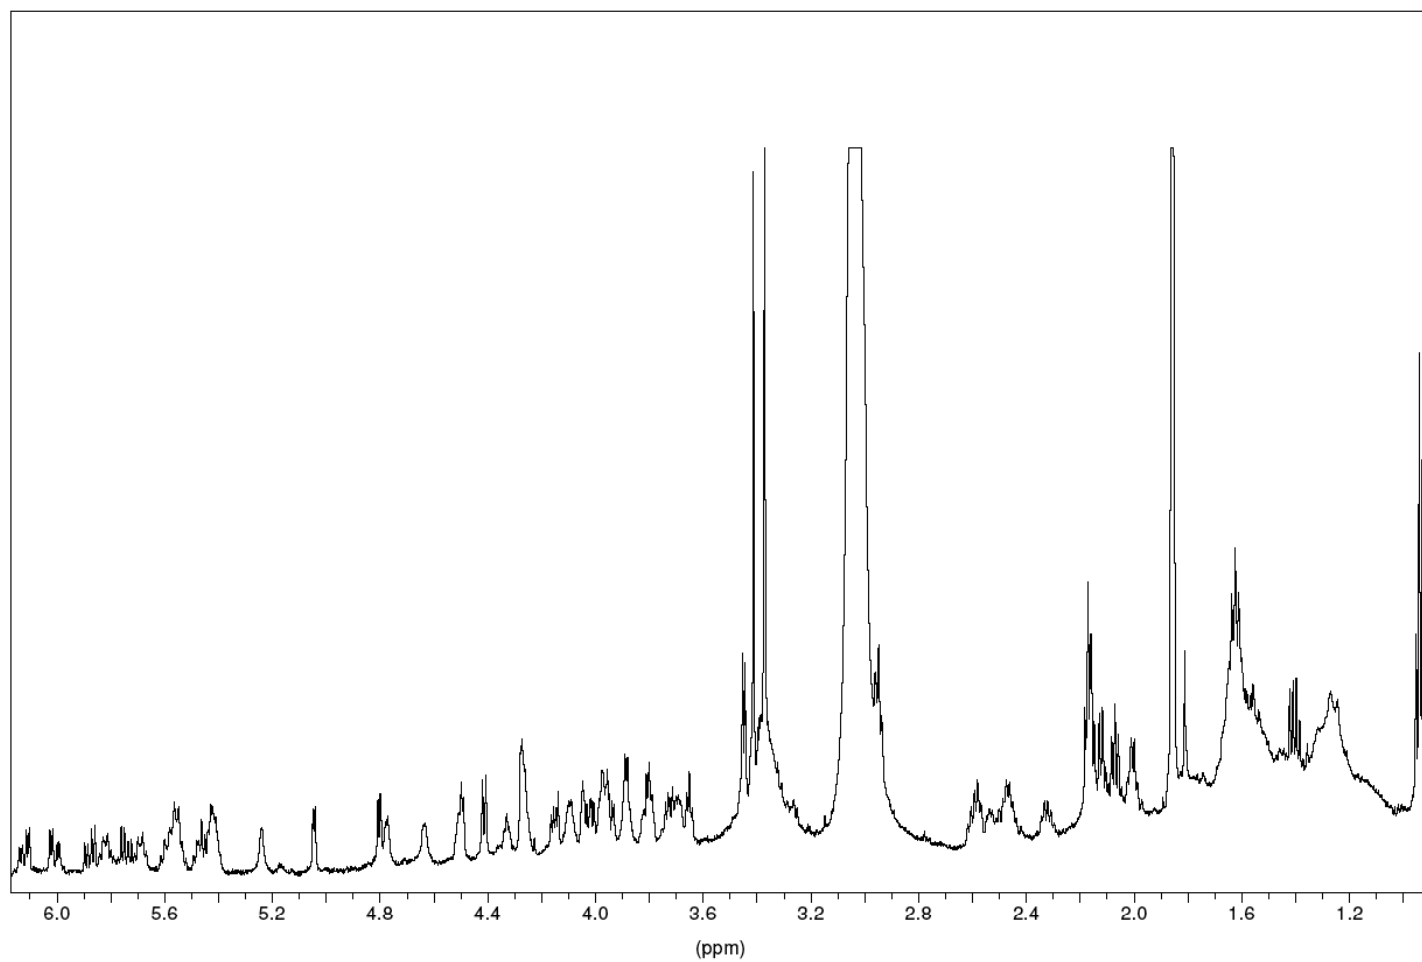

$^{13}\text{C}$  NMR Spectrum of Nigriganoside B Dimethyl Ester (**4**) recorded at 150 MHz in 25:2  $\text{C}_6\text{D}_6/\text{DMSO}-d_6$

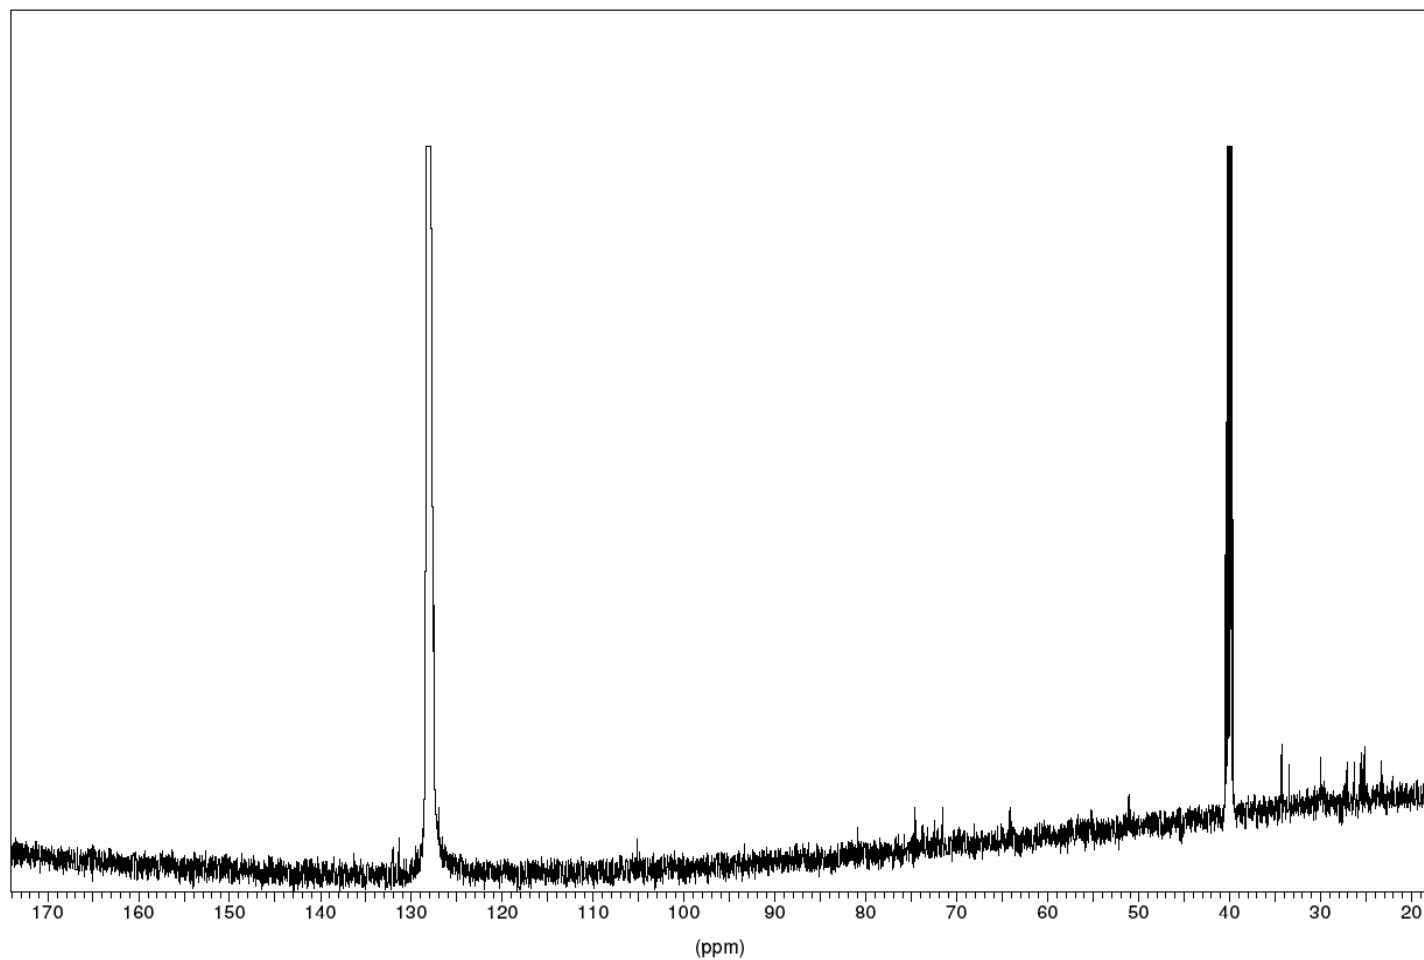

gradCOSY60 NMR Spectrum of Nigriganoside B Dimethyl Ester (**4**) recorded at 600 MHz in 25:2  
 $C_6D_6/DMSO-d_6$

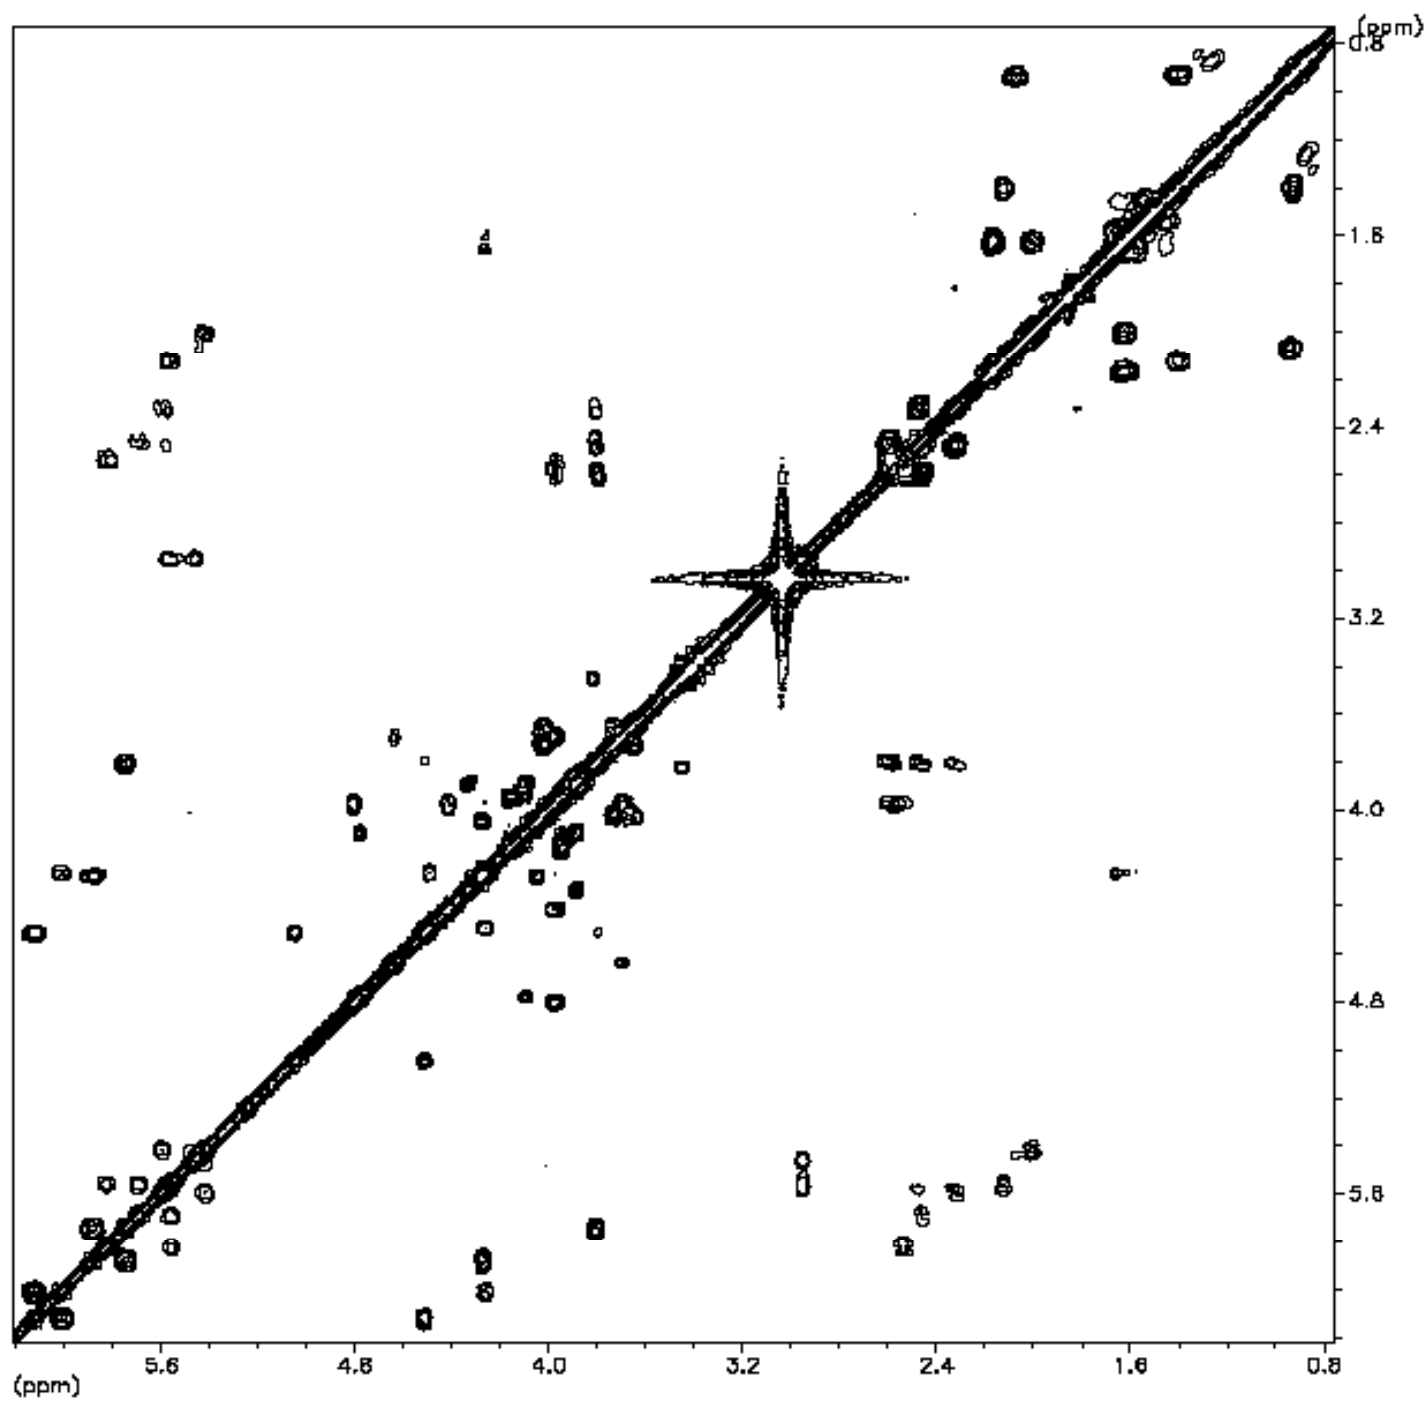

gradHSQC NMR Spectrum of Nigriganoside B Dimethyl Ester (**4**) recorded at 600 MHz in 25:2  
 $C_6D_6/DMSO-d_6$

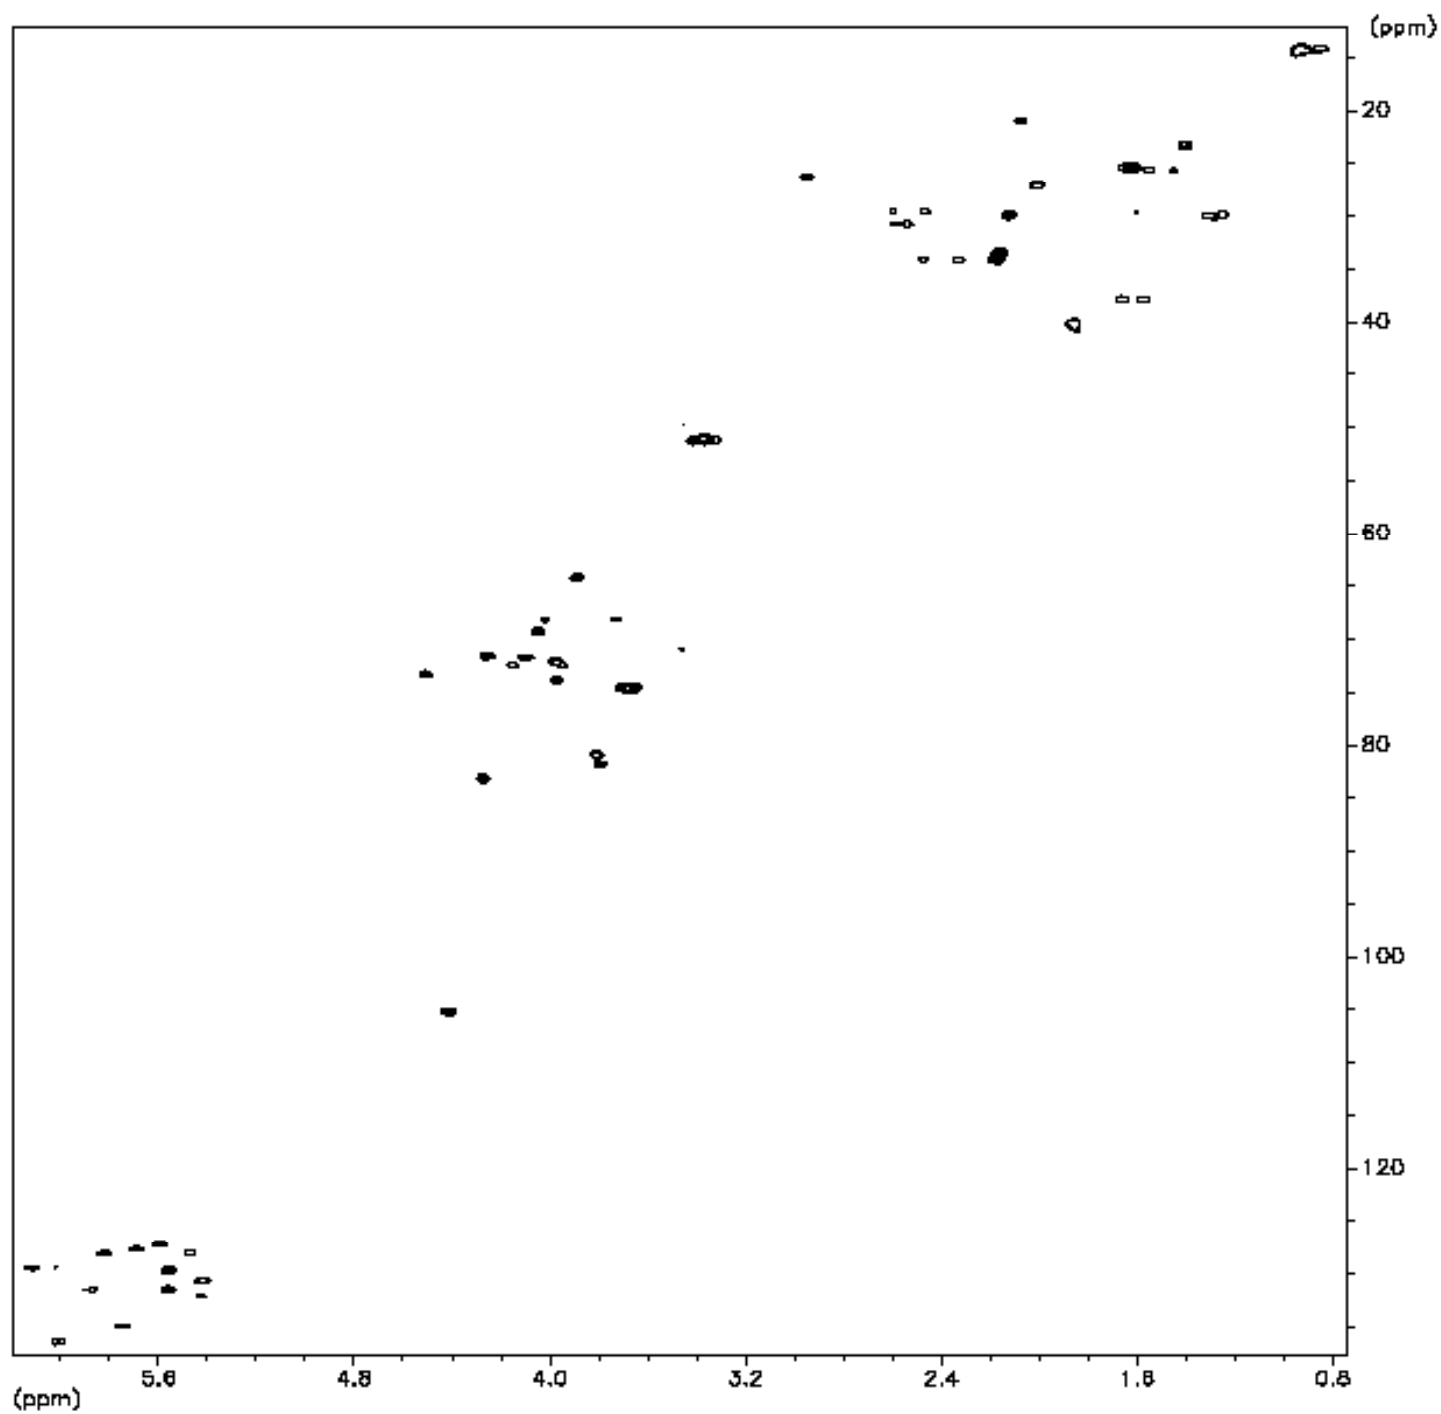

gradHMBC NMR Spectrum of Nigriganoside B Dimethyl Ester (**4**) recorded at 600 MHz in 25:2  
 $C_6D_6/DMSO-d_6$

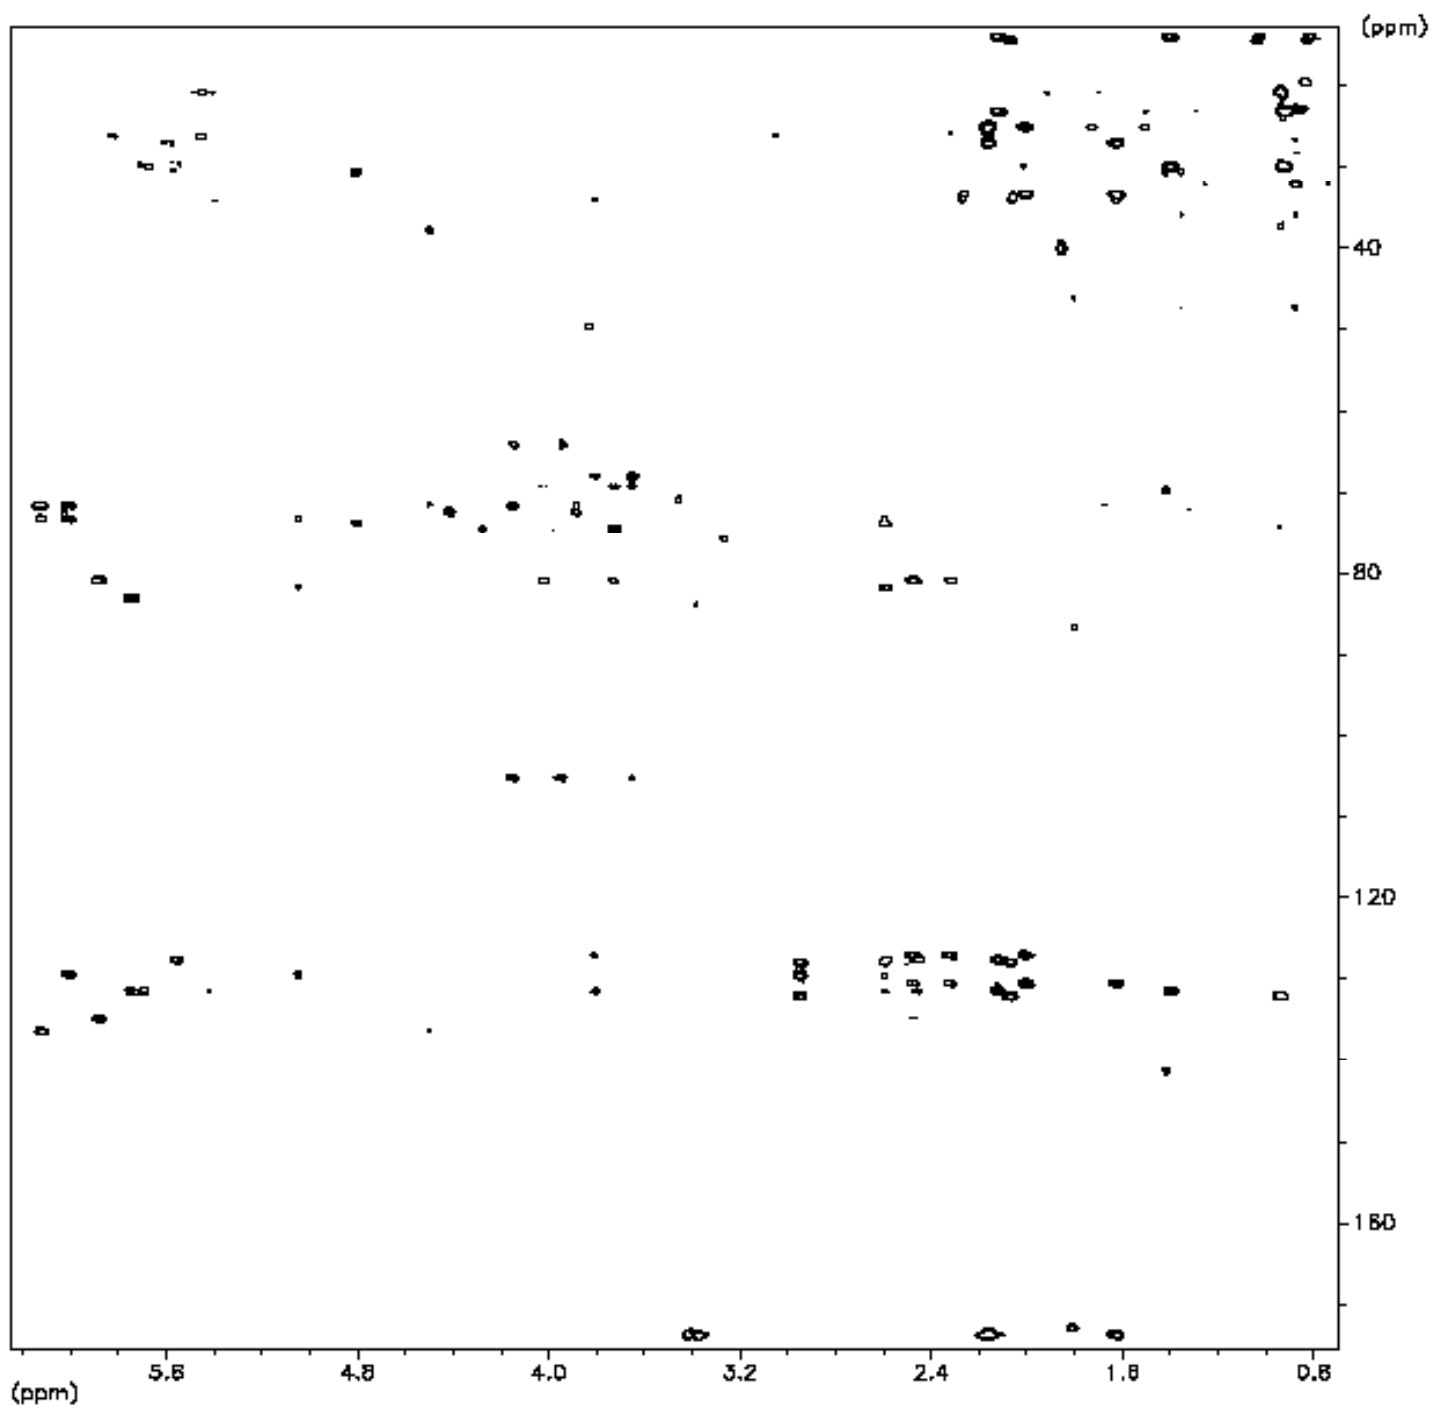



ROESY NMR Spectrum of Nigricanoside B Dimethyl Ester (**4**) recorded at 600 MHz in 25:2  
 $C_6D_6/DMSO-d_6$

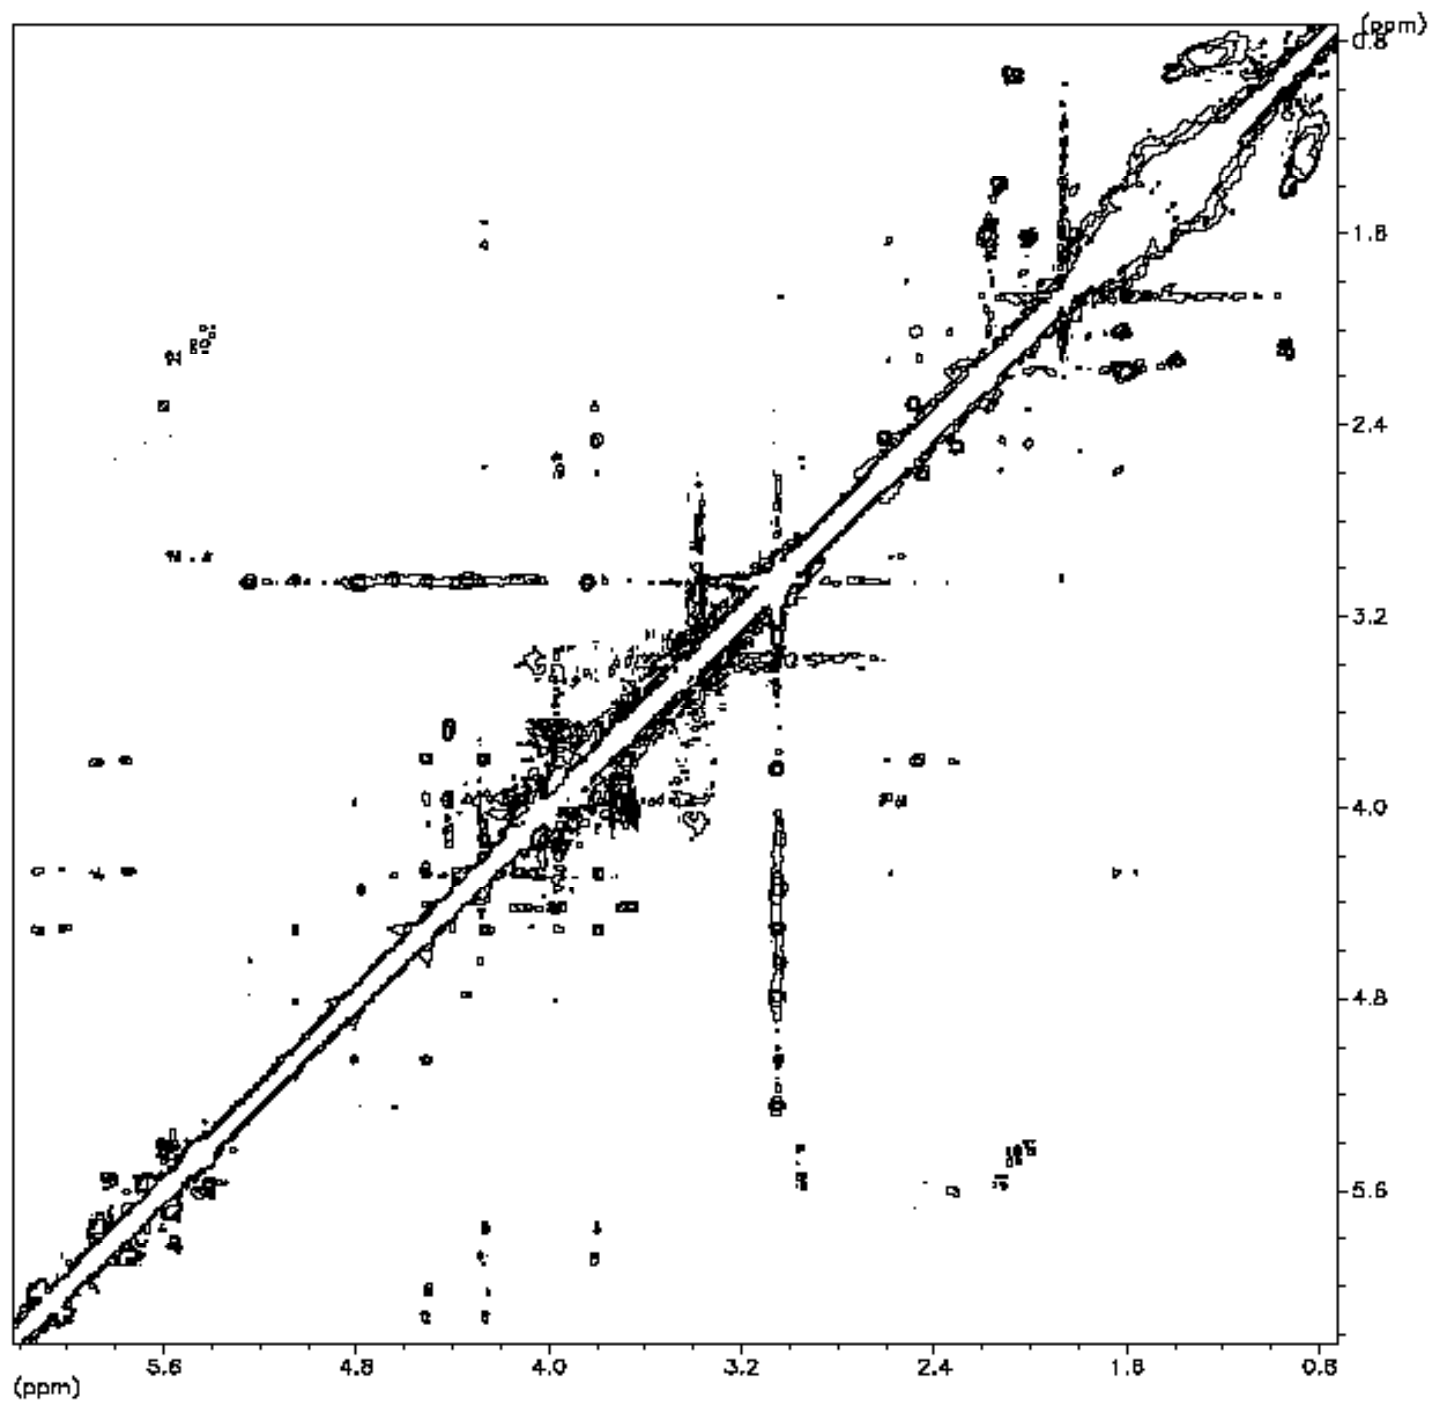

Supplement: Supplementary file 1 [file 4710199]
